# Supplementary material for: High-fat feeding rapidly induces obesity and lipid derangements in C57BL/6N mice
Source: PubMed Central journal article supplement — Mamm Genome. 2013 May 28;24(5):240–51. doi: 10.1007/s00335-013-9456-0 (PMC3685703; doi:10.1007/s00335-013-9456-0), 2013-05-28
Supplement: 335_2013_9456_MOESM1_ESM.pdf [file 335_2013_9456_MOESM1_ESM.pdf]

Supplementary table 1a

Percentage weight gain relative to starting weight at week 4 of male C57BL/6NTac mice exposed to HFD for varying lengths of time. n=30 per group

|         | Units | Control Diet<br>Mean ± SEM | 2 weeks HFD<br>Mean ± SEM | 4 weeks HFD<br>Mean ± SEM | 6 weeks HFD<br>Mean ± SEM | 12 weeks HFD<br>Mean ± SEM |
|---------|-------|----------------------------|---------------------------|---------------------------|---------------------------|----------------------------|
| Week 5  | %     | 19.9 ± 1.7                 | 23.3 ± 2.2                | 21.8 ± 2.0                | 21.1 ± 1.2                | 28.8 ± 1.7                 |
| Week 6  | %     | 29.3 ± 2.0                 | 33.3 ± 2.9                | 31.1 ± 2.3                | 29.7 ± 1.3                | 44.6 ± 2.6                 |
| Week 7  | %     | 37.5 ± 1.9                 | 42.9 ± 3.6                | 40.8 ± 2.6                | 39.7 ± 1.3                | 64.3 ± 3.1                 |
| Week 8  | %     | 46.0 ± 2.1                 | 51.2 ± 3.8                | 47.9 ± 2.6                | 48.1 ± 1.6                | 81.4 ± 3.5                 |
| Week 9  | %     | 54.6 ± 2.2                 | 57.0 ± 3.8                | 55.4 ± 2.6                | 56.1 ± 1.9                | 97.8 ± 3.6                 |
| Week 10 | %     | 62.3 ± 2.1                 | 64.1 ± 4.2                | 62.5 ± 2.7                | 63.8 ± 2.3                | 108.7 ± 4.1                |
| Week 11 | %     | 68.6 ± 2.4                 | 69.6 ± 4.4                | 68.5 ± 2.6                | 91.7 ± 2.6                | 121.1 ± 3.5                |
| Week 12 | %     | 74.8 ± 2.7                 | 76.6 ± 4.4                | 71.6 ± 3.0                | 106.9 ± 2.7               | 126.9 ± 4.3                |
| Week 13 | %     | 81.3 ± 2.8                 | 82.0 ± 4.5                | 100.0 ± 3.0               | 119.7 ± 3.0               | 137.1 ± 4.3                |
| Week 14 | %     | 87.8 ± 3.0                 | 86.4 ± 4.6                | 114.3 ± 3.7               | 127.5 ± 3.0               | 141.7 ± 4.6                |
| Week 15 | %     | 93.3 ± 3.0                 | 110.3 ± 5.4               | 125.5 ± 4.4               | 133.6 ± 3.2               | 146.3 ± 4.7                |
| Week 16 | %     | 99.5 ± 3.4                 | 124.2 ± 6.1               | 135.7 ± 5.2               | 140.1 ± 3.0               | 150.1 ± 4.7                |

Supplementary table 1b  
 Statistical analysis of percentage weight gain relative to starting weight at week 4 of male C57BL/6NTac mice exposed to HFD for varying lengths of time. n=30 per group. Where p<0.05, an effect size (Cohen's d) has been calculated.

**Week 5**

| Comparison |          |       | Effect size (Cohen's d) | Test                |
|------------|----------|-------|-------------------------|---------------------|
| Group 1    | Group 2  | p     |                         |                     |
| Control    | 2 weeks  | 0.624 |                         |                     |
| Control    | 4 weeks  | 0.811 |                         |                     |
| Control    | 6 weeks  | 1.000 |                         |                     |
| Control    | 12 weeks | 0.002 | -0.99                   | ANOVA + Tamhane's   |
| 2 weeks    | 4 weeks  | 1.000 |                         | T2 post hoc testing |
| 2 weeks    | 6 weeks  | 0.509 |                         |                     |
| 2 weeks    | 12 weeks | 0.589 |                         |                     |
| 4 weeks    | 6 weeks  | 0.700 |                         |                     |
| 4 weeks    | 12 weeks | 0.205 |                         |                     |
| 6 weeks    | 12 weeks | 0.000 | -1.01                   |                     |

**Week 6**

| Comparison |          |       | Effect size (Cohen's d) | Test                |
|------------|----------|-------|-------------------------|---------------------|
| Group 1    | Group 2  | p     |                         |                     |
| Control    | 2 weeks  | 0.704 |                         |                     |
| Control    | 4 weeks  | 0.749 |                         |                     |
| Control    | 6 weeks  | 1.000 |                         |                     |
| Control    | 12 weeks | 0.000 | -1.34                   | ANOVA + Tamhane's   |
| 2 weeks    | 4 weeks  | 1.000 |                         | T2 post hoc testing |
| 2 weeks    | 6 weeks  | 0.507 |                         |                     |
| 2 weeks    | 12 weeks | 0.068 |                         |                     |
| 4 weeks    | 6 weeks  | 0.482 |                         |                     |
| 4 weeks    | 12 weeks | 0.009 | -1.07                   |                     |
| 6 weeks    | 12 weeks | 0.000 | -1.45                   |                     |

**Week 7**

| Comparison |          |       | Effect size (Cohen's d) | Test                |
|------------|----------|-------|-------------------------|---------------------|
| Group 1    | Group 2  | p     |                         |                     |
| Control    | 2 weeks  | 0.627 |                         |                     |
| Control    | 4 weeks  | 0.416 |                         |                     |
| Control    | 6 weeks  | 1.000 |                         |                     |
| Control    | 12 weeks | 0.000 | -2.03                   | ANOVA + Tamhane's   |
| 2 weeks    | 4 weeks  | 1.000 |                         | T2 post hoc testing |
| 2 weeks    | 6 weeks  | 0.791 |                         |                     |
| 2 weeks    | 12 weeks | 0.000 | -1.23                   |                     |
| 4 weeks    | 6 weeks  | 0.589 |                         |                     |
| 4 weeks    | 12 weeks | 0.000 | -1.59                   |                     |
| 6 weeks    | 12 weeks | 0.000 | -2.10                   |                     |

**Week 8**

| Comparison |          |       | Effect size (Cohen's d) | Test                |
|------------|----------|-------|-------------------------|---------------------|
| Group 1    | Group 2  | p     |                         |                     |
| Control    | 2 weeks  | 0.816 |                         |                     |
| Control    | 4 weeks  | 0.864 |                         |                     |
| Control    | 6 weeks  | 1.000 |                         |                     |
| Control    | 12 weeks | 0.000 | -2.38                   | ANOVA + Tamhane's   |
| 2 weeks    | 4 weeks  | 1.000 |                         | T2 post hoc testing |
| 2 weeks    | 6 weeks  | 0.893 |                         |                     |
| 2 weeks    | 12 weeks | 0.000 | -1.58                   |                     |
| 4 weeks    | 6 weeks  | 0.936 |                         |                     |
| 4 weeks    | 12 weeks | 0.000 | -2.09                   |                     |
| 6 weeks    | 12 weeks | 0.000 | -2.45                   |                     |

**Week 9**

| Comparison |          |       | Effect size (Cohen's d) | Test                |
|------------|----------|-------|-------------------------|---------------------|
| Group 1    | Group 2  | p     |                         |                     |
| Control    | 2 weeks  | 0.993 |                         |                     |
| Control    | 4 weeks  | 0.963 |                         |                     |
| Control    | 6 weeks  | 1.000 |                         |                     |
| Control    | 12 weeks | 0.000 | -2.81                   | ANOVA + Tamhane's   |
| 2 weeks    | 4 weeks  | 1.000 |                         | T2 post hoc testing |
| 2 weeks    | 6 weeks  | 0.997 |                         |                     |
| 2 weeks    | 12 weeks | 0.000 | -2.09                   |                     |
| 4 weeks    | 6 weeks  | 0.977 |                         |                     |
| 4 weeks    | 12 weeks | 0.000 | -2.62                   |                     |
| 6 weeks    | 12 weeks | 0.000 | -2.86                   |                     |

**Week 10**

| Comparison |          |       | Effect size (Cohen's d) | Test                |
|------------|----------|-------|-------------------------|---------------------|
| Group 1    | Group 2  | p     |                         |                     |
| Control    | 2 weeks  | 0.996 |                         |                     |
| Control    | 4 weeks  | 0.951 |                         |                     |
| Control    | 6 weeks  | 1.000 |                         |                     |
| Control    | 12 weeks | 0.000 | -2.82                   | ANOVA + Tamhane's   |
| 2 weeks    | 4 weeks  | 1.000 |                         | T2 post hoc testing |
| 2 weeks    | 6 weeks  | 1.000 |                         |                     |
| 2 weeks    | 12 weeks | 0.000 | -2.07                   |                     |
| 4 weeks    | 6 weeks  | 0.996 |                         |                     |
| 4 weeks    | 12 weeks | 0.000 | -2.61                   |                     |
| 6 weeks    | 12 weeks | 0.000 | -2.67                   |                     |

**Week 11**

| Comparison |          |       | Effect size (Cohen's d) | Test                |
|------------|----------|-------|-------------------------|---------------------|
| Group 1    | Group 2  | p     |                         |                     |
| Control    | 2 weeks  | 1.000 |                         |                     |
| Control    | 4 weeks  | 0.959 |                         |                     |
| Control    | 6 weeks  | 0.000 | -1.87                   | ANOVA + Tamhane's   |
| Control    | 12 weeks | 0.000 | -3.59                   | T2 post hoc testing |
| 2 weeks    | 4 weeks  | 1.000 |                         |                     |
| 2 weeks    | 6 weeks  | 0.008 | -1.27                   |                     |
| 2 weeks    | 12 weeks | 0.000 | -2.62                   |                     |
| 4 weeks    | 6 weeks  | 0.000 | -1.81                   |                     |
| 4 weeks    | 12 weeks | 0.000 | -3.48                   |                     |
| 6 weeks    | 12 weeks | 0.000 | -1.94                   |                     |

**Week 12**

| Comparison |          |       | Effect size (Cohen's d) | Test                |
|------------|----------|-------|-------------------------|---------------------|
| Group 1    | Group 2  | p     |                         |                     |
| Control    | 2 weeks  | 1.000 |                         |                     |
| Control    | 4 weeks  | 0.847 |                         |                     |
| Control    | 6 weeks  | 0.000 | -2.39                   | ANOVA + Tamhane's   |
| Control    | 12 weeks | 0.000 | -2.83                   | T2 post hoc testing |
| 2 weeks    | 4 weeks  | 1.000 |                         |                     |
| 2 weeks    | 6 weeks  | 0.000 | -1.71                   |                     |
| 2 weeks    | 12 weeks | 0.000 | -2.22                   |                     |
| 4 weeks    | 6 weeks  | 0.000 | -2.61                   |                     |
| 4 weeks    | 12 weeks | 0.000 | -3.00                   |                     |
| 6 weeks    | 12 weeks | 0.000 | -1.08                   |                     |

**Week 13**

| Comparison |          |       | Effect size (Cohen's d) | Test                |
|------------|----------|-------|-------------------------|---------------------|
| Group 1    | Group 2  | p     |                         |                     |
| Control    | 2 weeks  | 1.000 |                         |                     |
| Control    | 4 weeks  | 0.000 | -1.30                   | ANOVA + Tamhane's   |
| Control    | 6 weeks  | 0.000 | -2.66                   | T2 post hoc testing |
| Control    | 12 weeks | 0.000 | -2.96                   |                     |
| 2 weeks    | 4 weeks  | 0.007 | -0.96                   |                     |
| 2 weeks    | 6 weeks  | 0.000 | -2.01                   |                     |
| 2 weeks    | 12 weeks | 0.000 | -2.38                   |                     |
| 4 weeks    | 6 weeks  | 0.018 | -1.32                   |                     |
| 4 weeks    | 12 weeks | 0.000 | -1.92                   |                     |
| 6 weeks    | 12 weeks | 0.001 | -0.90                   |                     |

**Week 14**

| Comparison |          |       | Effect size (Cohen's d) | Test                |
|------------|----------|-------|-------------------------|---------------------|
| Group 1    | Group 2  | p     |                         |                     |
| Control    | 2 weeks  | 1.000 |                         |                     |
| Control    | 4 weeks  | 0.000 | -1.62                   | ANOVA + Tamhane's   |
| Control    | 6 weeks  | 0.000 | -2.67                   | T2 post hoc testing |
| Control    | 12 weeks | 0.000 | -2.68                   |                     |
| 2 weeks    | 4 weeks  | 0.000 | -1.35                   |                     |
| 2 weeks    | 6 weeks  | 0.000 | -2.16                   |                     |
| 2 weeks    | 12 weeks | 0.000 | -2.27                   |                     |
| 4 weeks    | 6 weeks  | 0.628 |                         |                     |
| 4 weeks    | 12 weeks | 0.000 | -1.26                   |                     |
| 6 weeks    | 12 weeks | 0.018 | -0.71                   |                     |

**Week 15**

| Comparison |          |       | Effect size (Cohen's d) | Test                |
|------------|----------|-------|-------------------------|---------------------|
| Group 1    | Group 2  | p     |                         |                     |
| Control    | 2 weeks  | 0.017 | -0.81                   | ANOVA + Tamhane's   |
| Control    | 4 weeks  | 0.000 | -1.77                   | T2 post hoc testing |
| Control    | 6 weeks  | 0.000 | -2.63                   |                     |
| Control    | 12 weeks | 0.000 | -2.63                   |                     |
| 2 weeks    | 4 weeks  | 0.292 |                         |                     |
| 2 weeks    | 6 weeks  | 0.086 |                         |                     |
| 2 weeks    | 12 weeks | 0.000 | -1.37                   |                     |
| 4 weeks    | 6 weeks  | 1.000 |                         |                     |
| 4 weeks    | 12 weeks | 0.045 | -0.88                   |                     |
| 6 weeks    | 12 weeks | 0.052 |                         |                     |

**Week 16**

| Comparison |          |       | Effect size (Cohen's d) | Test                |
|------------|----------|-------|-------------------------|---------------------|
| Group 1    | Group 2  | p     |                         |                     |
| Control    | 2 weeks  | 0.004 | -1.04                   | ANOVA + Tamhane's   |
| Control    | 4 weeks  | 0.000 | -1.70                   | T2 post hoc testing |
| Control    | 6 weeks  | 0.000 | -2.53                   |                     |
| Control    | 12 weeks | 0.000 | -2.36                   |                     |
| 2 weeks    | 4 weeks  | 0.747 |                         |                     |
| 2 weeks    | 6 weeks  | 0.750 |                         |                     |
| 2 weeks    | 12 weeks | 0.030 | -0.91                   |                     |
| 4 weeks    | 6 weeks  | 1.000 |                         |                     |
| 4 weeks    | 12 weeks | 0.606 |                         |                     |
| 6 weeks    | 12 weeks | 0.182 |                         |                     |

Supplementary table 2a

DEXA (dual energy X-ray absorptiometry) results for 16 week old male C57BL/6NTac mice exposed to HFD for varying lengths of time. n=30 per group. Mice were anaesthetised with Ketamine hydrochloride(100mg/kg)/Xylazine hydrochloride (10mg/kg) prior to measurement.

|                          | Units             | Control Diet    | 2 weeks HFD     | 4 weeks HFD     | 6 weeks HFD     | 12 weeks HFD    | Trend observed         |
|--------------------------|-------------------|-----------------|-----------------|-----------------|-----------------|-----------------|------------------------|
|                          |                   | Mean ± SEM      |                        |
| Nose To Tail Base Length | cm                | 10.3 ± 0.03     | 10.3 ± 0.04     | 10.3 ± 0.04     | 10.3 ± 0.03     | 10.3 ± 0.04     | -                      |
| Bone Mineral Density     | g/cm <sup>2</sup> | 0.0493 ± 0.0004 | 0.0512 ± 0.0003 | 0.0506 ± 0.0003 | 0.0502 ± 0.0003 | 0.0497 ± 0.0003 | -                      |
| Bone Mineral Content     | g                 | 0.4616 ± 0.0055 | 0.4982 ± 0.0063 | 0.5070 ± 0.0068 | 0.5130 ± 0.0049 | 0.5060 ± 0.0054 | ↑ with HFD             |
| Bone Area                | cm <sup>2</sup>   | 9.36 ± 0.05     | 9.73 ± 0.07     | 10.00 ± 0.08    | 10.21 ± 0.06    | 10.17 ± 0.06    | ↑ with HFD             |
| Lean Mass                | g                 | 24.56 ± 0.33    | 23.52 ± 0.32    | 24.54 ± 0.36    | 23.66 ± 0.17    | 23.77 ± 0.28    | -                      |
| Fat Mass                 | g                 | 10.27 ± 0.58    | 12.91 ± 0.35    | 15.28 ± 0.37    | 17.42 ± 0.32    | 18.14 ± 0.27    | ↑ with exposure to HFD |
| Est Total Tissue Mass    | g                 | 34.83 ± 0.56    | 36.43 ± 0.48    | 39.82 ± 0.57    | 41.08 ± 0.36    | 41.91 ± 0.46    | ↑ with exposure to HFD |
| Fat Percentage Estimate  | %                 | 29.00 ± 1.33    | 35.34 ± 0.70    | 38.29 ± 0.62    | 42.31 ± 0.50    | 43.26 ± 0.36    | ↑ with exposure to HFD |

Supplementary table 2b

Statistical analysis of DEXA (dual energy X-ray absorptiometry) results for 16 week old male C57BL/6NTac mice exposed to HFD for varying lengths of time. n=30 per group. Where  $p < 0.05$ , an effect size (Cohen's d) has been calculated.

**Fat mass**

| Comparison |          |       | Effect size<br>(Cohen's<br>d) | Test        |
|------------|----------|-------|-------------------------------|-------------|
| Group 1    | Group 2  | p     |                               |             |
| Control    | 2 weeks  | 0.005 | -1.01                         |             |
| Control    | 4 weeks  | 0.000 | -1.88                         |             |
| Control    | 6 weeks  | 0.000 | -2.80                         |             |
| Control    | 12 weeks | 0.000 | -3.29                         | ANOVA +     |
| 2 weeks    | 4 weeks  | 0.000 | -1.18                         | Tamhane's   |
| 2 weeks    | 6 weeks  | 0.000 | -2.03                         | T2 post hoc |
| 2 weeks    | 12 weeks | 0.000 | -2.13                         | testing     |
| 4 weeks    | 6 weeks  | 0.001 | -0.50                         |             |
| 4 weeks    | 12 weeks | 0.000 | -0.74                         |             |
| 6 weeks    | 12 weeks | 0.609 |                               |             |

**Lean mass**

| Comparison |          |       | Effect size<br>(Cohen's<br>d) | Test        |
|------------|----------|-------|-------------------------------|-------------|
| Group 1    | Group 2  | p     |                               |             |
| Control    | 2 weeks  | 0.228 |                               |             |
| Control    | 4 weeks  | 1.000 |                               |             |
| Control    | 6 weeks  | 0.159 |                               |             |
| Control    | 12 weeks | 0.512 |                               | ANOVA +     |
| 2 weeks    | 4 weeks  | 0.319 |                               | Tamhane's   |
| 2 weeks    | 6 weeks  | 1.000 |                               | T2 post hoc |
| 2 weeks    | 12 weeks | 1.000 |                               | testing     |
| 4 weeks    | 6 weeks  | 0.274 |                               |             |
| 4 weeks    | 12 weeks | 0.632 |                               |             |
| 6 weeks    | 12 weeks | 0.329 |                               |             |

**Fat percentage estimate**

| Comparison |          |       | Effect size<br>(Cohen's<br>d) | Test        |
|------------|----------|-------|-------------------------------|-------------|
| Group 1    | Group 2  | p     |                               |             |
| Control    | 2 weeks  | 0.001 | -1.14                         |             |
| Control    | 4 weeks  | 0.000 | -1.74                         |             |
| Control    | 6 weeks  | 0.000 | -2.66                         |             |
| Control    | 12 weeks | 0.000 | -3.09                         | ANOVA +     |
| 2 weeks    | 4 weeks  | 0.025 | -0.82                         | Tamhane's   |
| 2 weeks    | 6 weeks  | 0.000 | -2.12                         | T2 post hoc |
| 2 weeks    | 12 weeks | 0.000 | -2.73                         | testing     |
| 4 weeks    | 6 weeks  | 0.000 | -1.31                         |             |
| 4 weeks    | 12 weeks | 0.000 | -1.87                         |             |
| 6 weeks    | 12 weeks | 0.744 |                               |             |

**Est total tissue mass**

| Comparison |          |       | Effect size<br>(Cohen's<br>d) | Test        |
|------------|----------|-------|-------------------------------|-------------|
| Group 1    | Group 2  | p     |                               |             |
| Control    | 2 weeks  | 0.328 |                               |             |
| Control    | 4 weeks  | 0.000 | -1.57                         |             |
| Control    | 6 weeks  | 0.000 | -2.41                         |             |
| Control    | 12 weeks | 0.000 | -2.45                         | ANOVA +     |
| 2 weeks    | 4 weeks  | 0.000 | -1.18                         | Tamhane's   |
| 2 weeks    | 6 weeks  | 0.000 | -2.03                         | T2 post hoc |
| 2 weeks    | 12 weeks | 0.000 | -2.13                         | testing     |
| 4 weeks    | 6 weeks  | 0.500 |                               |             |
| 4 weeks    | 12 weeks | 0.060 | -0.74                         |             |
| 6 weeks    | 12 weeks | 0.830 |                               |             |

**Nose to tail base length**

| Comparison |          |       | Effect size<br>(Cohen's<br>d) | Test        |
|------------|----------|-------|-------------------------------|-------------|
| Group 1    | Group 2  | p     |                               |             |
| Control    | 2 weeks  | 1.000 |                               |             |
| Control    | 4 weeks  | 1.000 |                               |             |
| Control    | 6 weeks  | 0.991 |                               |             |
| Control    | 12 weeks | 0.511 |                               | ANOVA +     |
| 2 weeks    | 4 weeks  | 1.000 |                               | Tamhane's   |
| 2 weeks    | 6 weeks  | 0.993 |                               | T2 post hoc |
| 2 weeks    | 12 weeks | 0.548 |                               | testing     |
| 4 weeks    | 6 weeks  | 1.000 |                               |             |
| 4 weeks    | 12 weeks | 0.769 |                               |             |
| 6 weeks    | 12 weeks | 0.979 |                               |             |

**Bone mineral density**

| Comparison |          |       | Effect size<br>(Cohen's<br>d) | Test        |
|------------|----------|-------|-------------------------------|-------------|
| Group 1    | Group 2  | p     |                               |             |
| Control    | 2 weeks  | 0.004 | -0.98                         |             |
| Control    | 4 weeks  | 0.104 |                               |             |
| Control    | 6 weeks  | 0.455 |                               |             |
| Control    | 12 weeks | 0.993 |                               | ANOVA +     |
| 2 weeks    | 4 weeks  | 0.954 |                               | Tamhane's   |
| 2 weeks    | 6 weeks  | 0.260 |                               | T2 post hoc |
| 2 weeks    | 12 weeks | 0.017 | 0.85                          | testing     |
| 4 weeks    | 6 weeks  | 0.984 |                               |             |
| 4 weeks    | 12 weeks | 0.391 |                               |             |
| 6 weeks    | 12 weeks | 0.936 |                               |             |

**Bone mineral content**

| Comparison |          |       | Effect size<br>(Cohen's<br>d) | Test        |
|------------|----------|-------|-------------------------------|-------------|
| Group 1    | Group 2  | p     |                               |             |
| Control    | 2 weeks  | 0.000 | -1.15                         |             |
| Control    | 4 weeks  | 0.000 | -1.36                         |             |
| Control    | 6 weeks  | 0.000 | -1.84                         |             |
| Control    | 12 weeks | 0.000 | -1.51                         | ANOVA +     |
| 2 weeks    | 4 weeks  | 0.986 |                               | Tamhane's   |
| 2 weeks    | 6 weeks  | 0.501 |                               | T2 post hoc |
| 2 weeks    | 12 weeks | 0.986 |                               | testing     |
| 4 weeks    | 6 weeks  | 0.998 |                               |             |
| 4 weeks    | 12 weeks | 1.000 |                               |             |
| 6 weeks    | 12 weeks | 0.984 |                               |             |

**Bone area**

| Comparison |          |       | Effect size<br>(Cohen's<br>d) | Test        |
|------------|----------|-------|-------------------------------|-------------|
| Group 1    | Group 2  | p     |                               |             |
| Control    | 2 weeks  | 0.001 | -1.07                         |             |
| Control    | 4 weeks  | 0.000 | -1.74                         |             |
| Control    | 6 weeks  | 0.000 | -2.82                         |             |
| Control    | 12 weeks | 0.000 | -2.57                         | ANOVA +     |
| 2 weeks    | 4 weeks  | 0.144 |                               | Tamhane's   |
| 2 weeks    | 6 weeks  | 0.000 | -1.35                         | T2 post hoc |
| 2 weeks    | 12 weeks | 0.000 | -1.20                         | testing     |
| 4 weeks    | 6 weeks  | 0.356 |                               |             |
| 4 weeks    | 12 weeks | 0.682 |                               |             |
| 6 weeks    | 12 weeks | 1.000 |                               |             |

Supplementary table 3a

Clinical chemistry results for 16 week old male C57BL/6NTac mice exposed to HFD for varying lengths of time. n=30 per group. Blood was collected via retro-orbital puncture from mice that were anaesthetised with Ketamine hydrochloride(100mg/kg)/Xylazine hydrochloride (10mg/kg) into lithium heparin coated tubes and plasma analysed on an Olympus AU400 except for tail-tip glucose measured by glucometer and insulin that was measured by Meso Scale Discovery array technology.

|                                    |       |        | Control Diet  | 2 weeks HFD   | 4 weeks HFD   | 6 weeks HFD    | 12 weeks HFD  | Trend observed         |
|------------------------------------|-------|--------|---------------|---------------|---------------|----------------|---------------|------------------------|
| Units                              |       |        | Mean ± SEM    | Mean ± SEM    | Mean ± SEM    | Mean ± SEM     | Mean ± SEM    |                        |
| <b>Electrolytes</b>                |       |        |               |               |               |                |               |                        |
| Sodium                             | Na+   | mmol/L | 147.9 ± 0.3   | 144.9 ± 0.3   | 144.2 ± 0.3   | 144.9 ± 0.3    | 143.0 ± 0.3   | ↓ with HFD             |
| Potassium                          | K+    | mmol/L | 4.0 ± 0.1     | 3.9 ± 0.1     | 4.0 ± 0.1     | 4.1 ± 0.1      | 4.3 ± 0.1     | -                      |
| Chloride                           | Cl-   | mmol/L | 107.2 ± 0.3   | 107.5 ± 0.3   | 107.2 ± 0.3   | 107.6 ± 0.3    | 105.8 ± 0.3   | -                      |
| <b>Metabolic</b>                   |       |        |               |               |               |                |               |                        |
| Tail tip glucose (pre-anaesthesia) |       | mmol/L | 9.5 ± 0.21    | 9.4 ± 0.18    | 9.6 ± 0.16    | 9.4 ± 0.21     | 10.3 ± 0.20   | -                      |
| Glucose (post-anaesthesia)         |       | mmol/L | 20.00 ± 0.61  | 24.99 ± 0.67  | 25.66 ± 0.83  | 25.10 ± 0.73   | 27.86 ± 0.79  | ↑ with exposure to HFD |
| Triglycerides                      | TG    | mmol/L | 1.49 ± 0.06   | 0.86 ± 0.03   | 0.89 ± 0.03   | 0.82 ± 0.04    | 0.68 ± 0.02   | ↓ with HFD             |
| Cholesterol                        | Chol  | mmol/L | 2.45 ± 0.08   | 4.95 ± 0.10   | 5.18 ± 0.20   | 6.30 ± 0.21    | 7.00 ± 0.16   | ↑ with exposure to HFD |
| High density Lipoproteins          | HDL   | mmol/L | 1.77 ± 0.06   | 3.33 ± 0.05   | 3.39 ± 0.12   | 3.89 ± 0.12    | 4.23 ± 0.08   | ↑ with exposure to HFD |
| Low density Lipoproteins           | LDL   | mmol/L | 0.38 ± 0.01   | 1.08 ± 0.03   | 1.24 ± 0.06   | 1.68 ± 0.07    | 2.00 ± 0.07   | ↑ with exposure to HFD |
| Non-esterified fatty acids-C       | NEFAC | mmol/L | 0.380 ± 0.01  | 0.390 ± 0.01  | 0.390 ± 0.03  | 0.485 ± 0.03   | 0.355 ± 0.02  | -                      |
| Glycerol                           |       | µmol/L | 178.7 ± 6.8   | 218.1 ± 7.9   | 220.9 ± 6.7   | 222.3 ± 7.2    | 174.0 ± 7.8   | -                      |
| Fructosamine                       |       | µmol/L | 218.51 ± 1.22 | 202.66 ± 1.72 | 203.25 ± 1.70 | 206.30 ± 1.60  | 198.52 ± 6.93 | ↓ with HFD             |
| Insulin                            |       | µg/L   | 0.72 ± 0.10   | 1.09 ± 0.12   | 1.02 ± 0.10   | 1.12 ± 0.11    | 1.09 ± 0.16   | ↑ with HFD             |
| <b>Pancreas</b>                    |       |        |               |               |               |                |               |                        |
| Amylase                            |       | U/L    | 631.9 ± 10.9  | 741.3 ± 8.0   | 742.9 ± 9.8   | 736.2 ± 10.0   | 736.8 ± 18.1  | ↑ with HFD             |
| <b>Protein</b>                     |       |        |               |               |               |                |               |                        |
| Total protein                      |       | g/L    | 45.8 ± 0.3    | 48.1 ± 0.3    | 48.6 ± 0.4    | 50.3 ± 0.5     | 51.6 ± 0.4    | ↑ with exposure to HFD |
| Albumin                            |       | g/L    | 25.07 ± 0.18  | 25.05 ± 0.19  | 25.70 ± 0.17  | 26.42 ± 0.19   | 26.84 ± 0.16  | ↑ with exposure to HFD |
| <b>Liver/Muscle</b>                |       |        |               |               |               |                |               |                        |
| Aspartate aminotransferase         | AST   | U/L    | 56.2 ± 2.4    | 81.4 ± 4.1    | 102.9 ± 10.0  | 218.7 ± 29.1   | 270.5 ± 13.4  | ↑ with exposure to HFD |
| Alkaline phosphatase               | ALP   | U/L    | 67.1 ± 1.5    | 67.0 ± 1.8    | 76.6 ± 3.3    | 102.2 ± 6.6    | 136.8 ± 4.7   | ↑ with exposure to HFD |
| Alanine aminotransferase           | ALT   | U/L    | 51.2 ± 3.9    | 67.5 ± 4.8    | 108.6 ± 10.1  | 239.7 ± 27.5   | 323.9 ± 17.6  | ↑ with exposure to HFD |
| Lactate dehydrogenase              | LDH   | U/L    | 455.3 ± 21.0  | 509.5 ± 26.2  | 896.1 ± 77.3  | 1145.4 ± 149.9 | 1702.4 ± 94.5 | ↑ with exposure to HFD |
| Total bilirubin                    |       | µmol/L | 2.0 ± 0.1     | 1.9 ± 0.1     | 2.1 ± 0.1     | 2.4 ± 0.1      | 2.3 ± 0.0     | -                      |
| Creatine kinase                    | CK    | U/L    | 303.6 ± 39.8  | 312.3 ± 45.5  | 272.5 ± 44.1  | 391.5 ± 58.6   | 387.9 ± 67.0  | -                      |
| <b>Kidney</b>                      |       |        |               |               |               |                |               |                        |
| Creatinine                         |       | µmol/L | 12.2 ± 0.3    | 9.9 ± 0.2     | 10.3 ± 0.3    | 10.4 ± 0.2     | 10.6 ± 0.3    | ↓ with HFD             |
| Urea                               |       | mmol/L | 10.2 ± 0.2    | 8.6 ± 0.2     | 7.7 ± 0.2     | 7.1 ± 0.1      | 6.5 ± 0.1     | ↓ with exposure to HFD |
| Uric acid                          |       | µmol/L | 28.7 ± 1.2    | 34.2 ± 2.1    | 42.3 ± 3.2    | 35.8 ± 1.7     | 41.3 ± 2.3    | -                      |
| <b>Minerals and Iron</b>           |       |        |               |               |               |                |               |                        |
| Calcium                            |       | mmol/L | 2.25 ± 0.01   | 2.25 ± 0.01   | 2.26 ± 0.01   | 2.30 ± 0.01    | 2.33 ± 0.01   | -                      |
| Phosphorus                         |       | mmol/L | 2.2 ± 0.0     | 2.3 ± 0.1     | 2.4 ± 0.0     | 2.4 ± 0.0      | 2.4 ± 0.0     | -                      |
| Magnesium                          |       | mmol/L | 1.05 ± 0.02   | 0.87 ± 0.01   | 0.83 ± 0.01   | 0.87 ± 0.01    | 0.88 ± 0.01   | ↓ with HFD             |
| Iron                               |       | µmol/L | 21.6 ± 0.4    | 24.1 ± 0.8    | 28.3 ± 0.7    | 33.4 ± 0.9     | 33.5 ± 1.1    | ↑ with exposure to HFD |

Supplementary table 3b  
 Statistical analysis of clinical chemistry results for 16 week old male C57BL/6NTac mice exposed to HFD for varying lengths of time. n=30 per group. Where p<0.05, an effect size (Cohen's d) has been calculated.

**Glucose**

| Comparison |          |       |             |             |
|------------|----------|-------|-------------|-------------|
| Group 1    | Group 2  | p     | Effect size | Test        |
| Control    | 2 weeks  | 0.000 | -1.43       |             |
| Control    | 4 weeks  | 0.000 | -1.44       |             |
| Control    | 6 weeks  | 0.000 | -1.40       |             |
| Control    | 12 weeks | 0.000 | -2.06       | ANOVA +     |
| 2 weeks    | 4 weeks  | 1.000 |             | Tamhane's   |
| 2 weeks    | 6 weeks  | 1.000 |             | T2 post hoc |
| 2 weeks    | 12 weeks | 0.072 |             | testing     |
| 4 weeks    | 6 weeks  | 1.000 |             |             |
| 4 weeks    | 12 weeks | 0.461 |             |             |
| 6 weeks    | 12 weeks | 0.119 |             |             |

**Amylase**

| Comparison |          |       |             |             |
|------------|----------|-------|-------------|-------------|
| Group 1    | Group 2  | p     | Effect size | Test        |
| Control    | 2 weeks  | 0.000 | -2.11       |             |
| Control    | 4 weeks  | 0.000 | -1.95       |             |
| Control    | 6 weeks  | 0.000 | -1.82       |             |
| Control    | 12 weeks | 0.000 | -1.32       | ANOVA +     |
| 2 weeks    | 4 weeks  | 1.000 |             | Tamhane's   |
| 2 weeks    | 6 weeks  | 1.000 |             | T2 post hoc |
| 2 weeks    | 12 weeks | 1.000 |             | testing     |
| 4 weeks    | 6 weeks  | 1.000 |             |             |
| 4 weeks    | 12 weeks | 1.000 |             |             |
| 6 weeks    | 12 weeks | 1.000 |             |             |

**Iron**

| Comparison |          |       | Effect size (Cohen's d) | Test        |
|------------|----------|-------|-------------------------|-------------|
| Group 1    | Group 2  | p     |                         |             |
| Control    | 2 weeks  | 0.052 |                         |             |
| Control    | 4 weeks  | 0.000 | -2.28                   |             |
| Control    | 6 weeks  | 0.000 | -3.48                   |             |
| Control    | 12 weeks | 0.000 | -2.92                   | ANOVA +     |
| 2 weeks    | 4 weeks  | 0.001 | -1.06                   | Tamhane's   |
| 2 weeks    | 6 weeks  | 0.000 | -2.10                   | T2 post     |
| 2 weeks    | 12 weeks | 0.000 | -1.84                   | hoc testing |
| 4 weeks    | 6 weeks  | 0.000 | -1.18                   |             |
| 4 weeks    | 12 weeks | 0.003 | -1.04                   |             |
| 6 weeks    | 12 weeks | 1.000 |                         |             |

**Triglycerides**

| Comparison |          |       | Effect size (Cohen's d) | Test        |
|------------|----------|-------|-------------------------|-------------|
| Group 1    | Group 2  | p     |                         |             |
| Control    | 2 weeks  | 0.000 | 2.76                    |             |
| Control    | 4 weeks  | 0.000 | 2.39                    |             |
| Control    | 6 weeks  | 0.000 | 2.66                    |             |
| Control    | 12 weeks | 0.000 | 3.64                    | ANOVA +     |
| 2 weeks    | 4 weeks  | 1.000 |                         | Tamhane's   |
| 2 weeks    | 6 weeks  | 0.977 |                         | T2 post hoc |
| 2 weeks    | 12 weeks | 0.000 | 1.33                    | testing     |
| 4 weeks    | 6 weeks  | 0.829 |                         |             |
| 4 weeks    | 12 weeks | 0.000 | 1.29                    |             |
| 6 weeks    | 12 weeks | 0.021 | 0.85                    |             |

**Aspartate aminotransferase (AST)**

| Comparison |          |       | Effect size | Test        |
|------------|----------|-------|-------------|-------------|
| Group 1    | Group 2  | p     |             |             |
| Control    | 2 weeks  | 0.000 | -1.41       |             |
| Control    | 4 weeks  | 0.002 | -1.38       |             |
| Control    | 6 weeks  | 0.000 | -1.89       |             |
| Control    | 12 weeks | 0.000 | -4.95       | ANOVA +     |
| 2 weeks    | 4 weeks  | 0.520 |             | Tamhane's   |
| 2 weeks    | 6 weeks  | 0.001 | -1.51       | T2 post hoc |
| 2 weeks    | 12 weeks | 0.000 | -3.93       | testing     |
| 4 weeks    | 6 weeks  | 0.006 | -1.08       |             |
| 4 weeks    | 12 weeks | 0.000 | -2.62       |             |
| 6 weeks    | 12 weeks | 0.699 |             |             |

**Total bilirubin**

| Comparison |          |       | Effect size (Cohen's d) | Test        |
|------------|----------|-------|-------------------------|-------------|
| Group 1    | Group 2  | p     |                         |             |
| Control    | 2 weeks  | 0.773 |                         |             |
| Control    | 4 weeks  | 0.996 |                         |             |
| Control    | 6 weeks  | 0.187 |                         |             |
| Control    | 12 weeks | 0.012 | -0.94                   | ANOVA +     |
| 2 weeks    | 4 weeks  | 0.155 |                         | Tamhane's   |
| 2 weeks    | 6 weeks  | 0.007 | -1.02                   | T2 post     |
| 2 weeks    | 12 weeks | 0.000 | -1.64                   | hoc testing |
| 4 weeks    | 6 weeks  | 0.533 |                         |             |
| 4 weeks    | 12 weeks | 0.115 |                         |             |
| 6 weeks    | 12 weeks | 1.000 |                         |             |

**Cholesterol**

| Comparison |          |       | Effect size (Cohen's d) | Test        |
|------------|----------|-------|-------------------------|-------------|
| Group 1    | Group 2  | p     |                         |             |
| Control    | 2 weeks  | 0.000 | -5.14                   |             |
| Control    | 4 weeks  | 0.000 | -3.55                   |             |
| Control    | 6 weeks  | 0.000 | -4.86                   |             |
| Control    | 12 weeks | 0.000 | -6.87                   | ANOVA +     |
| 2 weeks    | 4 weeks  | 0.977 |                         | Tamhane's   |
| 2 weeks    | 6 weeks  | 0.000 | -1.59                   | T2 post hoc |
| 2 weeks    | 12 weeks | 0.000 | -2.86                   | testing     |
| 4 weeks    | 6 weeks  | 0.003 | -0.99                   |             |
| 4 weeks    | 12 weeks | 0.000 | -1.82                   |             |
| 6 weeks    | 12 weeks | 0.099 |                         |             |

**Alkaline phosphatase (ALP)**

| Comparison |          |       | Effect size | Test        |
|------------|----------|-------|-------------|-------------|
| Group 1    | Group 2  | p     |             |             |
| Control    | 2 weeks  | 1.000 |             |             |
| Control    | 4 weeks  | 0.109 |             |             |
| Control    | 6 weeks  | 0.000 | -1.59       |             |
| Control    | 12 weeks | 0.000 | -4.09       | ANOVA +     |
| 2 weeks    | 4 weeks  | 0.125 |             | Tamhane's   |
| 2 weeks    | 6 weeks  | 0.000 | -1.54       | T2 post hoc |
| 2 weeks    | 12 weeks | 0.000 | -3.90       | testing     |
| 4 weeks    | 6 weeks  | 0.011 | -0.95       |             |
| 4 weeks    | 12 weeks | 0.000 | -2.75       |             |
| 6 weeks    | 12 weeks | 0.001 | -1.12       |             |

**Creatinine**

| Comparison |          |       | Effect size (Cohen's d) | Test        |
|------------|----------|-------|-------------------------|-------------|
| Group 1    | Group 2  | p     |                         |             |
| Control    | 2 weeks  | 0.000 | 1.59                    |             |
| Control    | 4 weeks  | 0.000 | 1.22                    |             |
| Control    | 6 weeks  | 0.000 | 1.41                    |             |
| Control    | 12 weeks | 0.002 | 1.02                    | ANOVA +     |
| 2 weeks    | 4 weeks  | 0.968 |                         | Tamhane's   |
| 2 weeks    | 6 weeks  | 0.588 |                         | T2 post     |
| 2 weeks    | 12 weeks | 0.358 |                         | hoc testing |
| 4 weeks    | 6 weeks  | 1.000 |                         |             |
| 4 weeks    | 12 weeks | 0.991 |                         |             |
| 6 weeks    | 12 weeks | 0.998 |                         |             |

**HDL-cholesterol**

| Comparison |          |       | Effect size (Cohen's d) | Test        |
|------------|----------|-------|-------------------------|-------------|
| Group 1    | Group 2  | p     |                         |             |
| Control    | 2 weeks  | 0.000 | -5.21                   |             |
| Control    | 4 weeks  | 0.000 | -3.23                   |             |
| Control    | 6 weeks  | 0.000 | -4.36                   |             |
| Control    | 12 weeks | 0.000 | -6.45                   | ANOVA +     |
| 2 weeks    | 4 weeks  | 1.000 |                         | Tamhane's   |
| 2 weeks    | 6 weeks  | 0.001 | -1.22                   | T2 post hoc |
| 2 weeks    | 12 weeks | 0.000 | -2.56                   | testing     |

**Alanine Transferase (ALT)**

| Comparison |          |       | Effect size | Test        |
|------------|----------|-------|-------------|-------------|
| Group 1    | Group 2  | p     |             |             |
| Control    | 2 weeks  | 0.098 |             |             |
| Control    | 4 weeks  | 0.000 | -1.49       |             |
| Control    | 6 weeks  | 0.000 | -2.19       |             |
| Control    | 12 weeks | 0.000 | -4.63       | ANOVA +     |
| 2 weeks    | 4 weeks  | 0.010 | -1.01       | Tamhane's   |
| 2 weeks    | 6 weeks  | 0.000 | -1.95       | T2 post hoc |
| 2 weeks    | 12 weeks | 0.000 | -4.18       | testing     |

**Urea**

| Comparison |          |       | Effect size (Cohen's d) | Test        |
|------------|----------|-------|-------------------------|-------------|
| Group 1    | Group 2  | p     |                         |             |
| Control    | 2 weeks  | 0.000 | 1.51                    |             |
| Control    | 4 weeks  | 0.000 | 2.30                    |             |
| Control    | 6 weeks  | 0.000 | 3.25                    |             |
| Control    | 12 weeks | 0.000 | 4.18                    | ANOVA +     |
| 2 weeks    | 4 weeks  | 0.018 | 0.85                    | Tamhane's   |
| 2 weeks    | 6 weeks  | 0.000 | 1.68                    | T2 post     |
| 2 weeks    | 12 weeks | 0.000 | 2.54                    | hoc testing |

|         |          |       |       |
|---------|----------|-------|-------|
| 4 weeks | 6 weeks  | 0.043 | -0.77 |
| 4 weeks | 12 weeks | 0.000 | -1.53 |
| 6 weeks | 12 weeks | 0.175 |       |

|         |          |       |       |
|---------|----------|-------|-------|
| 4 weeks | 6 weeks  | 0.001 | -1.27 |
| 4 weeks | 12 weeks | 0.000 | -2.83 |
| 6 weeks | 12 weeks | 0.123 |       |

|         |          |       |      |
|---------|----------|-------|------|
| 4 weeks | 6 weeks  | 0.075 |      |
| 4 weeks | 12 weeks | 0.000 | 1.48 |
| 6 weeks | 12 weeks | 0.031 | 0.81 |

**LDL-cholesterol**

| Comparison |          | Effect size (Cohen's d) |       |                     |
|------------|----------|-------------------------|-------|---------------------|
| Group 1    | Group 2  | p                       | d     | Test                |
| Control    | 2 weeks  | 0.000                   | -5.69 |                     |
| Control    | 4 weeks  | 0.000                   | -4.42 |                     |
| Control    | 6 weeks  | 0.000                   | -5.86 |                     |
| Control    | 12 weeks | 0.000                   | -6.88 | ANOVA + Tamhane's   |
| 2 weeks    | 4 weeks  | 0.152                   |       | T2 post hoc testing |
| 2 weeks    | 6 weeks  | 0.000                   | -2.23 |                     |
| 2 weeks    | 12 weeks | 0.000                   | -3.26 |                     |
| 4 weeks    | 6 weeks  | 0.000                   | -1.28 |                     |
| 4 weeks    | 12 weeks | 0.000                   | -2.14 |                     |
| 6 weeks    | 12 weeks | 0.017                   | -0.85 |                     |

**Lactate dehydrogenase (LDH)**

| Comparison |          | Effect size (Cohen's d) |       |                     |
|------------|----------|-------------------------|-------|---------------------|
| Group 1    | Group 2  | p                       | d     | Test                |
| Control    | 2 weeks  | 0.709                   |       |                     |
| Control    | 4 weeks  | 0.020                   | -1.08 |                     |
| Control    | 6 weeks  | 0.001                   | -1.47 |                     |
| Control    | 12 weeks | 0.000                   | -3.94 | ANOVA + Tamhane's   |
| 2 weeks    | 4 weeks  | 0.100                   |       | T2 post hoc testing |
| 2 weeks    | 6 weeks  | 0.003                   | -1.32 |                     |
| 2 weeks    | 12 weeks | 0.000                   | -3.61 |                     |
| 4 weeks    | 6 weeks  | 0.238                   |       |                     |
| 4 weeks    | 12 weeks | 0.000                   | -2.03 |                     |
| 6 weeks    | 12 weeks | 0.032                   | -0.83 |                     |

**Uric Acid**

| Comparison |          | Effect size (Cohen's d) |       |                     |
|------------|----------|-------------------------|-------|---------------------|
| Group 1    | Group 2  | p                       | d     | Test                |
| Control    | 2 weeks  | 0.237                   |       |                     |
| Control    | 4 weeks  | 0.003                   | -1.15 |                     |
| Control    | 6 weeks  | 0.013                   | -0.89 |                     |
| Control    | 12 weeks | 0.000                   | -1.32 | ANOVA + Tamhane's   |
| 2 weeks    | 4 weeks  | 0.311                   |       | T2 post hoc testing |
| 2 weeks    | 6 weeks  | 1.000                   |       |                     |
| 2 weeks    | 12 weeks | 0.240                   |       |                     |
| 4 weeks    | 6 weeks  | 0.549                   |       |                     |
| 4 weeks    | 12 weeks | 1.000                   |       |                     |
| 6 weeks    | 12 weeks | 0.482                   |       |                     |

**Fructosamine**

| Comparison |          | Effect size (Cohen's d) |      |                     |
|------------|----------|-------------------------|------|---------------------|
| Group 1    | Group 2  | p                       | d    | Test                |
| Control    | 2 weeks  | 0.000                   | 1.96 |                     |
| Control    | 4 weeks  | 0.000                   | 1.91 |                     |
| Control    | 6 weeks  | 0.000                   | 1.58 |                     |
| Control    | 12 weeks | 0.000                   | 0.90 | ANOVA + Tamhane's   |
| 2 weeks    | 4 weeks  | 1.000                   |      | T2 post hoc testing |
| 2 weeks    | 6 weeks  | 0.745                   |      |                     |
| 2 weeks    | 12 weeks | 0.886                   |      |                     |
| 4 weeks    | 6 weeks  | 0.888                   |      |                     |
| 4 weeks    | 12 weeks | 0.973                   |      |                     |
| 6 weeks    | 12 weeks | 1.000                   |      |                     |

**Creatine Kinase (CK)**

| Comparison |          | Effect size (Cohen's d) |   |                     |
|------------|----------|-------------------------|---|---------------------|
| Group 1    | Group 2  | p                       | d | Test                |
| Control    | 2 weeks  | 1.000                   |   |                     |
| Control    | 4 weeks  | 1.000                   |   |                     |
| Control    | 6 weeks  | 0.995                   |   |                     |
| Control    | 12 weeks | 1.000                   |   | ANOVA + Tamhane's   |
| 2 weeks    | 4 weeks  | 1.000                   |   | T2 post hoc testing |
| 2 weeks    | 6 weeks  | 1.000                   |   |                     |
| 2 weeks    | 12 weeks | 1.000                   |   |                     |
| 4 weeks    | 6 weeks  | 0.994                   |   |                     |
| 4 weeks    | 12 weeks | 0.999                   |   |                     |
| 6 weeks    | 12 weeks | 1.000                   |   |                     |

**Sodium**

| Comparison |          | Effect size (Cohen's d) |      |                     |
|------------|----------|-------------------------|------|---------------------|
| Group 1    | Group 2  | p                       | d    | Test                |
| Control    | 2 weeks  | 0.000                   | 1.76 |                     |
| Control    | 4 weeks  | 0.000                   | 2.34 |                     |
| Control    | 6 weeks  | 0.000                   | 1.78 |                     |
| Control    | 12 weeks | 0.000                   | 2.84 | ANOVA + Tamhane's   |
| 2 weeks    | 4 weeks  | 0.816                   |      | T2 post hoc testing |
| 2 weeks    | 6 weeks  | 1.000                   |      |                     |
| 2 weeks    | 12 weeks | 0.002                   | 1.02 |                     |
| 4 weeks    | 6 weeks  | 0.767                   |      |                     |
| 4 weeks    | 12 weeks | 0.051                   |      |                     |
| 6 weeks    | 12 weeks | 0.001                   | 1.05 |                     |

**Free fatty acids**

| Comparison |          | Effect size (Cohen's d) |       |                     |
|------------|----------|-------------------------|-------|---------------------|
| Group 1    | Group 2  | p                       | d     | Test                |
| Control    | 2 weeks  | 1.000                   |       |                     |
| Control    | 4 weeks  | 1.000                   |       |                     |
| Control    | 6 weeks  | 0.013                   | -0.93 |                     |
| Control    | 12 weeks | 0.942                   |       | ANOVA + Tamhane's   |
| 2 weeks    | 4 weeks  | 1.000                   |       | T2 post hoc testing |
| 2 weeks    | 6 weeks  | 0.030                   | -0.86 |                     |
| 2 weeks    | 12 weeks | 0.683                   |       |                     |
| 4 weeks    | 6 weeks  | 0.119                   |       |                     |
| 4 weeks    | 12 weeks | 0.949                   |       |                     |
| 6 weeks    | 12 weeks | 0.002                   | 1.09  |                     |

**Total Protein**

| Comparison |          | Effect size (Cohen's d) |       |                     |
|------------|----------|-------------------------|-------|---------------------|
| Group 1    | Group 2  | p                       | d     | Test                |
| Control    | 2 weeks  | 0.000                   | -1.39 |                     |
| Control    | 4 weeks  | 0.000                   | -1.57 |                     |
| Control    | 6 weeks  | 0.000                   | -2.17 |                     |
| Control    | 12 weeks | 0.000                   | -3.06 | ANOVA + Tamhane's   |
| 2 weeks    | 4 weeks  | 0.976                   |       | T2 post hoc testing |
| 2 weeks    | 6 weeks  | 0.003                   | -1.04 |                     |
| 2 weeks    | 12 weeks | 0.000                   | -1.78 |                     |
| 4 weeks    | 6 weeks  | 0.044                   | -0.77 |                     |
| 4 weeks    | 12 weeks | 0.000                   | -1.44 |                     |
| 6 weeks    | 12 weeks | 0.418                   |       |                     |

**Potassium**

| Comparison |          | Effect size (Cohen's d) |       |                     |
|------------|----------|-------------------------|-------|---------------------|
| Group 1    | Group 2  | p                       | d     | Test                |
| Control    | 2 weeks  | 0.999                   |       |                     |
| Control    | 4 weeks  | 0.995                   |       |                     |
| Control    | 6 weeks  | 0.558                   |       |                     |
| Control    | 12 weeks | 0.023                   | -0.83 | ANOVA + Tamhane's   |
| 2 weeks    | 4 weeks  | 0.551                   |       | T2 post hoc testing |
| 2 weeks    | 6 weeks  | 0.037                   | -0.78 |                     |
| 2 weeks    | 12 weeks | 0.000                   | -1.17 |                     |
| 4 weeks    | 6 weeks  | 0.955                   |       |                     |
| 4 weeks    | 12 weeks | 0.073                   |       |                     |
| 6 weeks    | 12 weeks | 0.555                   |       |                     |

**Glycerol**

| Comparison |          | Effect size (Cohen's d) |       |                     |
|------------|----------|-------------------------|-------|---------------------|
| Group 1    | Group 2  | p                       | d     | Test                |
| Control    | 2 weeks  | 0.004                   | -0.98 |                     |
| Control    | 4 weeks  | 0.000                   | -1.14 |                     |
| Control    | 6 weeks  | 0.000                   | -1.13 |                     |
| Control    | 12 weeks | 1.000                   |       | ANOVA + Tamhane's   |
| 2 weeks    | 4 weeks  | 1.000                   |       | T2 post hoc testing |
| 2 weeks    | 6 weeks  | 1.000                   |       |                     |
| 2 weeks    | 12 weeks | 0.002                   | 1.02  |                     |
| 4 weeks    | 6 weeks  | 1.000                   |       |                     |

**Albumin**

| Comparison |          | Effect size (Cohen's d) |       |                     |
|------------|----------|-------------------------|-------|---------------------|
| Group 1    | Group 2  | p                       | d     | Test                |
| Control    | 2 weeks  | 1.000                   |       |                     |
| Control    | 4 weeks  | 0.137                   |       |                     |
| Control    | 6 weeks  | 0.000                   | -1.34 |                     |
| Control    | 12 weeks | 0.000                   | -1.93 | ANOVA + Tamhane's   |
| 2 weeks    | 4 weeks  | 0.130                   |       | T2 post hoc testing |
| 2 weeks    | 6 weeks  | 0.000                   | -1.33 |                     |
| 2 weeks    | 12 weeks | 0.000                   | -1.89 |                     |
| 4 weeks    | 6 weeks  | 0.067                   |       |                     |

**Chloride**

| Comparison |          | Effect size (Cohen's d) |      |                     |
|------------|----------|-------------------------|------|---------------------|
| Group 1    | Group 2  | p                       | d    | Test                |
| Control    | 2 weeks  | 0.998                   |      |                     |
| Control    | 4 weeks  | 1.000                   |      |                     |
| Control    | 6 weeks  | 0.991                   |      |                     |
| Control    | 12 weeks | 0.003                   | 1.00 | ANOVA + Tamhane's   |
| 2 weeks    | 4 weeks  | 0.997                   |      | T2 post hoc testing |
| 2 weeks    | 6 weeks  | 1.000                   |      |                     |
| 2 weeks    | 12 weeks | 0.001                   | 1.08 |                     |
| 4 weeks    | 6 weeks  | 0.988                   |      |                     |

|         |          |       |      |
|---------|----------|-------|------|
| 4 weeks | 12 weeks | 0.000 | 1.18 |
| 6 weeks | 12 weeks | 0.000 | 1.17 |

|         |          |       |       |
|---------|----------|-------|-------|
| 4 weeks | 12 weeks | 0.000 | -1.25 |
| 6 weeks | 12 weeks | 0.637 |       |

|         |          |       |      |
|---------|----------|-------|------|
| 4 weeks | 12 weeks | 0.002 | 1.04 |
| 6 weeks | 12 weeks | 0.000 | 1.20 |

**Tail-tip glucose**

| Comparison |          |       | Effect size<br>(Cohen's<br>d) | Test                    |
|------------|----------|-------|-------------------------------|-------------------------|
| Group 1    | Group 2  | p     |                               |                         |
| Control    | 2 weeks  | 1.000 |                               |                         |
| Control    | 4 weeks  | 0.983 |                               |                         |
| Control    | 6 weeks  | 1.000 |                               |                         |
| Control    | 12 weeks | 0.027 | -0.73                         | ANOVA +<br>Tukey's      |
| 2 weeks    | 4 weeks  | 0.948 |                               | HSD post<br>hoc testing |
| 2 weeks    | 6 weeks  | 1.000 |                               |                         |
| 2 weeks    | 12 weeks | 0.015 | -0.84                         |                         |
| 4 weeks    | 6 weeks  | 0.959 |                               |                         |
| 4 weeks    | 12 weeks | 0.106 |                               |                         |
| 6 weeks    | 12 weeks | 0.017 | -0.77                         |                         |

**Calcium**

| Comparison |          |       | Effect size<br>(Cohen's<br>d) | Test                   |
|------------|----------|-------|-------------------------------|------------------------|
| Group 1    | Group 2  | p     |                               |                        |
| Control    | 2 weeks  | 1.000 |                               |                        |
| Control    | 4 weeks  | 1.000 |                               |                        |
| Control    | 6 weeks  | 0.002 | -1.04                         | ANOVA +<br>Tamhane's   |
| Control    | 12 weeks | 0.000 | -1.85                         | T2 post hoc<br>testing |
| 2 weeks    | 4 weeks  | 1.000 |                               |                        |
| 2 weeks    | 6 weeks  | 0.002 | -1.02                         |                        |
| 2 weeks    | 12 weeks | 0.000 | -1.80                         |                        |
| 4 weeks    | 6 weeks  | 0.037 | -0.78                         |                        |
| 4 weeks    | 12 weeks | 0.000 | -1.43                         |                        |
| 6 weeks    | 12 weeks | 0.122 |                               |                        |

**Magnesium**

| Comparison |          |       | Effect size<br>(Cohen's<br>d) | Test                   |
|------------|----------|-------|-------------------------------|------------------------|
| Group 1    | Group 2  | p     |                               |                        |
| Control    | 2 weeks  | 0.000 | 2.32                          |                        |
| Control    | 4 weeks  | 0.000 | 2.66                          |                        |
| Control    | 6 weeks  | 0.000 | 2.55                          | ANOVA +<br>Tamhane's   |
| Control    | 12 weeks | 0.000 | 2.57                          | T2 post<br>hoc testing |
| 2 weeks    | 4 weeks  | 0.536 |                               |                        |
| 2 weeks    | 6 weeks  | 1.000 |                               |                        |
| 2 weeks    | 12 weeks | 1.000 |                               |                        |
| 4 weeks    | 6 weeks  | 0.198 |                               |                        |
| 4 weeks    | 12 weeks | 0.103 |                               |                        |
| 6 weeks    | 12 weeks | 1.000 |                               |                        |

**Insulin**

| Comparison |          |       | Effect size<br>(Cohen's<br>d) | Test                    |
|------------|----------|-------|-------------------------------|-------------------------|
| Group 1    | Group 2  | p     |                               |                         |
| Control    | 2 weeks  | 0.026 | -0.61                         |                         |
| Control    | 4 weeks  | 0.027 | -0.55                         |                         |
| Control    | 6 weeks  | 0.004 | -0.70                         |                         |
| Control    | 12 weeks | 0.035 | -0.52                         | ANOVA +<br>Tukey's      |
| 2 weeks    | 4 weeks  | 1.000 |                               | HSD post<br>hoc testing |
| 2 weeks    | 6 weeks  | 0.971 |                               |                         |
| 2 weeks    | 12 weeks | 1.000 |                               |                         |
| 4 weeks    | 6 weeks  | 0.967 |                               |                         |
| 4 weeks    | 12 weeks | 1.000 |                               |                         |
| 6 weeks    | 12 weeks | 0.948 |                               |                         |

**Phosphorus**

| Comparison |          |       | Effect size<br>(Cohen's<br>d) | Test                   |
|------------|----------|-------|-------------------------------|------------------------|
| Group 1    | Group 2  | p     |                               |                        |
| Control    | 2 weeks  | 0.867 |                               |                        |
| Control    | 4 weeks  | 0.415 |                               |                        |
| Control    | 6 weeks  | 0.200 |                               |                        |
| Control    | 12 weeks | 0.034 | -0.81                         | ANOVA +<br>Tamhane's   |
| 2 weeks    | 4 weeks  | 1.000 |                               | T2 post hoc<br>testing |
| 2 weeks    | 6 weeks  | 0.999 |                               |                        |
| 2 weeks    | 12 weeks | 0.929 |                               |                        |
| 4 weeks    | 6 weeks  | 1.000 |                               |                        |
| 4 weeks    | 12 weeks | 0.987 |                               |                        |
| 6 weeks    | 12 weeks | 0.999 |                               |                        |



Supplementary table 4a

Wet liver weights of 16 week old male C57BL/6NTac mice exposed to HFD for varying lengths of time. n=30 per group.

|                | Control Diet    | 2 weeks HFD     | 4 weeks HFD     | 6 weeks HFD     | 12 weeks HFD    | Trend observed                  |
|----------------|-----------------|-----------------|-----------------|-----------------|-----------------|---------------------------------|
| Units          | Mean $\pm$ SEM  |                                 |
| Liver weight g | 1.74 $\pm$ 0.03 | 1.94 $\pm$ 0.04 | 2.42 $\pm$ 0.12 | 2.78 $\pm$ 0.09 | 3.43 $\pm$ 0.20 | $\uparrow$ with exposure to HFD |

Supplementary table 4b

Statistical analysis of wet liver weights of 16 week old C57BL/6NTac male mice exposed to HFD for varying lengths of time. n=30 per group. Where  $p < 0.05$ , an effect size (Cohen's d) has been calculated.

**Liver weight**

| Comparison |          |       | Effect size<br>(Cohen's<br>d) | Test     |
|------------|----------|-------|-------------------------------|----------|
| Group 1    | Group 2  | p     |                               |          |
| Control    | 2 weeks  | 0.012 | -1.82                         |          |
| Control    | 4 weeks  | 0.003 | -2.86                         |          |
| Control    | 6 weeks  | 0.000 | -5.80                         |          |
| Control    | 12 weeks | 0.000 | -4.62                         | ANOVA +  |
| 2 weeks    | 4 weeks  | 0.037 | -1.81                         | Tukey's  |
| 2 weeks    | 6 weeks  | 0.000 | -4.08                         | HSD post |
| 2 weeks    | 12 weeks | 0.000 | -3.79                         | hoc      |
| 4 weeks    | 6 weeks  | 0.262 |                               | testing  |
| 4 weeks    | 12 weeks | 0.008 | -1.94                         |          |
| 6 weeks    | 12 weeks | 0.121 |                               |          |

Supplementary table 5a

Haematology results for 16 week old male C57BL/6NTac mice exposed to HFD for varying lengths of time. n=30 per group. Blood was collected via retro-orbital puncture from mice that were anaesthetised with Ketamine hydrochloride(100mg/kg)/Xylazine hydrochloride (10mg/kg) into EDTA coated tubes and analysed on a *scii* VetABC analyser.

|                                                   | Units                | Control Diet | 2 weeks HFD  | 4 weeks HFD  | 6 weeks HFD  | 12 weeks HFD | Trend observed         |
|---------------------------------------------------|----------------------|--------------|--------------|--------------|--------------|--------------|------------------------|
|                                                   |                      | Mean ± SEM   |                        |
| White blood cells                                 | x10 <sup>3</sup> /µl | 6.44 ± 0.17  | 5.88 ± 0.16  | 6.58 ± 0.20  | 7.07 ± 0.25  | 7.49 ± 0.20  | -                      |
| Red blood cells                                   | x10 <sup>6</sup> /µl | 10.66 ± 0.07 | 10.92 ± 0.10 | 10.82 ± 0.09 | 11.25 ± 0.05 | 10.70 ± 0.06 | -                      |
| Haemoglobin                                       | g/dl                 | 15.53 ± 0.08 | 15.71 ± 0.16 | 15.54 ± 0.11 | 15.97 ± 0.08 | 15.45 ± 0.08 | -                      |
| Haematocrit                                       | %                    | 47.52 ± 0.28 | 48.02 ± 0.42 | 47.93 ± 0.39 | 49.49 ± 0.23 | 47.95 ± 0.25 | -                      |
| Mean cell volume                                  | fl                   | 45 ± 0.1     | 44 ± 0.1     | 44 ± 0.2     | 44 ± 0.1     | 45 ± 0.1     | -                      |
| Mean corpuscular haemoglobin (MCH)                | pg                   | 14.58 ± 0.06 | 14.39 ± 0.05 | 14.37 ± 0.06 | 14.20 ± 0.05 | 14.44 ± 0.07 | -                      |
| Mean corpuscular haemoglobin concentration (MCHC) | g/dl                 | 32.68 ± 0.12 | 32.71 ± 0.13 | 32.44 ± 0.13 | 32.28 ± 0.10 | 32.23 ± 0.12 | -                      |
| Platelets                                         | x10 <sup>3</sup> /µl | 1461 ± 27    | 1402 ± 20    | 1299 ± 29    | 1250 ± 33    | 1214 ± 24    | ↓ with exposure to HFD |
| Red cell distribution width (RDW)                 | %                    | 11.49 ± 0.08 | 11.68 ± 0.07 | 11.49 ± 0.06 | 11.45 ± 0.06 | 11.46 ± 0.07 | -                      |
| Mean platelet volume (MPV)                        | fl                   | 5.20 ± 0.02  | 5.34 ± 0.02  | 5.32 ± 0.02  | 5.32 ± 0.02  | 5.41 ± 0.02  | -                      |

Supplementary table 5b  
 Statistical analysis of haematology results for 16 week old male C57BL/6NTac mice exposed to HFD for varying lengths of time. n=30 per group. Where p<0.05, an effect size (Cohen's d) has been calculated.

#### White blood cells

| Comparison |          |  | p     | Effect size (Cohen's d) | Test        |
|------------|----------|--|-------|-------------------------|-------------|
| Group 1    | Group 2  |  |       |                         |             |
| Control    | 2 weeks  |  | 0.205 |                         |             |
| Control    | 4 weeks  |  | 1.000 |                         |             |
| Control    | 6 weeks  |  | 0.359 |                         |             |
| Control    | 12 weeks |  | 0.002 | -1.02                   | ANOVA +     |
| 2 weeks    | 4 weeks  |  | 0.083 |                         | Tamhane's   |
| 2 weeks    | 6 weeks  |  | 0.002 | -1.05                   | T2 post hoc |
| 2 weeks    | 12 weeks |  | 0.000 | -1.61                   | testing     |
| 4 weeks    | 6 weeks  |  | 0.762 |                         |             |
| 4 weeks    | 12 weeks |  | 0.023 | -0.82                   |             |
| 6 weeks    | 12 weeks |  | 0.889 |                         |             |

#### Red blood cells

| Comparison |          |  | p     | Effect size (Cohen's d) | Test        |
|------------|----------|--|-------|-------------------------|-------------|
| Group 1    | Group 2  |  |       |                         |             |
| Control    | 2 weeks  |  | 0.300 |                         |             |
| Control    | 4 weeks  |  | 0.761 |                         |             |
| Control    | 6 weeks  |  | 0.000 | -1.95                   | ANOVA +     |
| Control    | 12 weeks |  | 1.000 |                         | Tamhane's   |
| 2 weeks    | 4 weeks  |  | 0.998 |                         | T2 post hoc |
| 2 weeks    | 6 weeks  |  | 0.042 | -0.83                   | testing     |
| 2 weeks    | 12 weeks |  | 0.574 |                         |             |
| 4 weeks    | 6 weeks  |  | 0.001 | -1.19                   |             |
| 4 weeks    | 12 weeks |  | 0.963 |                         |             |
| 6 weeks    | 12 weeks |  | 0.000 | 1.82                    |             |

#### Haemoglobin

| Comparison |          |  | p     | Effect size (Cohen's d) | Test        |
|------------|----------|--|-------|-------------------------|-------------|
| Group 1    | Group 2  |  |       |                         |             |
| Control    | 2 weeks  |  | 0.977 |                         |             |
| Control    | 4 weeks  |  | 1.000 |                         |             |
| Control    | 6 weeks  |  | 0.001 | -1.05                   | ANOVA +     |
| Control    | 12 weeks |  | 0.999 |                         | Tamhane's   |
| 2 weeks    | 4 weeks  |  | 0.994 |                         | T2 post hoc |
| 2 weeks    | 6 weeks  |  | 0.776 |                         | testing     |
| 2 weeks    | 12 weeks |  | 0.809 |                         |             |
| 4 weeks    | 6 weeks  |  | 0.024 | -0.84                   |             |
| 4 weeks    | 12 weeks |  | 0.999 |                         |             |
| 6 weeks    | 12 weeks |  | 0.000 | 1.26                    |             |

#### Haematocrit

| Comparison |          |  | p     | Effect size (Cohen's d) | Test        |
|------------|----------|--|-------|-------------------------|-------------|
| Group 1    | Group 2  |  |       |                         |             |
| Control    | 2 weeks  |  | 0.981 |                         |             |
| Control    | 4 weeks  |  | 0.993 |                         |             |
| Control    | 6 weeks  |  | 0.000 | -1.40                   | ANOVA +     |
| Control    | 12 weeks |  | 0.950 |                         | Tamhane's   |
| 2 weeks    | 4 weeks  |  | 1.000 |                         | T2 post hoc |
| 2 weeks    | 6 weeks  |  | 0.039 | -0.82                   | testing     |
| 2 weeks    | 12 weeks |  | 1.000 |                         |             |
| 4 weeks    | 6 weeks  |  | 0.012 | -0.91                   |             |
| 4 weeks    | 12 weeks |  | 1.000 |                         |             |
| 6 weeks    | 12 weeks |  | 0.000 | 1.17                    |             |

#### Mean cell volume

| Comparison |          |  | p     | Effect size (Cohen's d) | Test        |
|------------|----------|--|-------|-------------------------|-------------|
| Group 1    | Group 2  |  |       |                         |             |
| Control    | 2 weeks  |  | 0.010 | 0.95                    |             |
| Control    | 4 weeks  |  | 0.871 |                         |             |
| Control    | 6 weeks  |  | 0.010 | 0.95                    | ANOVA +     |
| Control    | 12 weeks |  | 0.972 |                         | Tamhane's   |
| 2 weeks    | 4 weeks  |  | 0.706 |                         | T2 post hoc |
| 2 weeks    | 6 weeks  |  | 1.000 |                         | testing     |
| 2 weeks    | 12 weeks |  | 0.000 | -1.43                   |             |
| 4 weeks    | 6 weeks  |  | 0.706 |                         |             |
| 4 weeks    | 12 weeks |  | 0.174 |                         |             |
| 6 weeks    | 12 weeks |  | 0.000 | -1.43                   |             |

#### Mean corpuscular haemoglobin (MCH)

| Comparison |          |  | p     | Effect size (Cohen's d) | Test        |
|------------|----------|--|-------|-------------------------|-------------|
| Group 1    | Group 2  |  |       |                         |             |
| Control    | 2 weeks  |  | 0.251 |                         |             |
| Control    | 4 weeks  |  | 0.219 |                         |             |
| Control    | 6 weeks  |  | 0.000 | 1.25                    | ANOVA +     |
| Control    | 12 weeks |  | 0.800 |                         | Tamhane's   |
| 2 weeks    | 4 weeks  |  | 1.000 |                         | T2 post hoc |
| 2 weeks    | 6 weeks  |  | 0.097 |                         | testing     |
| 2 weeks    | 12 weeks |  | 1.000 |                         |             |
| 4 weeks    | 6 weeks  |  | 0.268 |                         |             |
| 4 weeks    | 12 weeks |  | 0.998 |                         |             |
| 6 weeks    | 12 weeks |  | 0.054 | -0.76                   |             |

#### Mean corpuscular haemoglobin concentration (MCHC)

| Comparison |          |  | p     | Effect size (Cohen's d) | Test        |
|------------|----------|--|-------|-------------------------|-------------|
| Group 1    | Group 2  |  |       |                         |             |
| Control    | 2 weeks  |  | 1.000 |                         |             |
| Control    | 4 weeks  |  | 0.855 |                         |             |
| Control    | 6 weeks  |  | 0.109 |                         |             |
| Control    | 12 weeks |  | 0.075 |                         | ANOVA +     |
| 2 weeks    | 4 weeks  |  | 0.823 |                         | Tamhane's   |
| 2 weeks    | 6 weeks  |  | 0.114 |                         | T2 post hoc |
| 2 weeks    | 12 weeks |  | 0.078 |                         | testing     |
| 4 weeks    | 6 weeks  |  | 0.981 |                         |             |
| 4 weeks    | 12 weeks |  | 0.925 |                         |             |
| 6 weeks    | 12 weeks |  | 1.000 |                         |             |

#### Platelets

| Comparison |          |  | p     | Effect size (Cohen's d) | Test        |
|------------|----------|--|-------|-------------------------|-------------|
| Group 1    | Group 2  |  |       |                         |             |
| Control    | 2 weeks  |  | 0.565 |                         |             |
| Control    | 4 weeks  |  | 0.001 | 1.06                    |             |
| Control    | 6 weeks  |  | 0.000 | 1.29                    |             |
| Control    | 12 weeks |  | 0.000 | 1.77                    | ANOVA +     |
| 2 weeks    | 4 weeks  |  | 0.050 | 0.77                    | Tamhane's   |
| 2 weeks    | 6 weeks  |  | 0.002 | 1.06                    | T2 post hoc |
| 2 weeks    | 12 weeks |  | 0.000 | 1.56                    | testing     |
| 4 weeks    | 6 weeks  |  | 0.955 |                         |             |
| 4 weeks    | 12 weeks |  | 0.253 |                         |             |
| 6 weeks    | 12 weeks |  | 0.993 |                         |             |

#### Red cell distribution width (RDW)

| Comparison |          |  | p     | Effect size (Cohen's d) | Test        |
|------------|----------|--|-------|-------------------------|-------------|
| Group 1    | Group 2  |  |       |                         |             |
| Control    | 2 weeks  |  | 0.582 |                         |             |
| Control    | 4 weeks  |  | 1.000 |                         |             |
| Control    | 6 weeks  |  | 1.000 |                         |             |
| Control    | 12 weeks |  | 1.000 |                         | ANOVA +     |
| 2 weeks    | 4 weeks  |  | 0.361 |                         | Tamhane's   |
| 2 weeks    | 6 weeks  |  | 0.170 |                         | T2 post hoc |
| 2 weeks    | 12 weeks |  | 0.247 |                         | testing     |
| 4 weeks    | 6 weeks  |  | 1.000 |                         |             |
| 4 weeks    | 12 weeks |  | 1.000 |                         |             |
| 6 weeks    | 12 weeks |  | 1.000 |                         |             |

#### Mean platelet volume (MPV)

| Comparison |          |  | p     | Effect size | Test        |
|------------|----------|--|-------|-------------|-------------|
| Group 1    | Group 2  |  |       |             |             |
| Control    | 2 weeks  |  | 0.002 | -1.05       |             |
| Control    | 4 weeks  |  | 0.004 | -0.98       |             |
| Control    | 6 weeks  |  | 0.001 | -1.10       |             |
| Control    | 12 weeks |  | 0.000 | -1.82       | ANOVA +     |
| 2 weeks    | 4 weeks  |  | 1.000 |             | Tamhane's   |
| 2 weeks    | 6 weeks  |  | 1.000 |             | T2 post hoc |
| 2 weeks    | 12 weeks |  | 0.246 |             | testing     |
| 4 weeks    | 6 weeks  |  | 1.000 |             |             |
| 4 weeks    | 12 weeks |  | 0.035 | -0.79       |             |
| 6 weeks    | 12 weeks |  | 0.027 | -0.81       |             |

Supplementary table 6

Percentage weight gain relative to starting weight at week 4 of female C57BL/6NTac mice exposed to HFD for varying lengths of time. n=30 per group.

|         |       | Control Diet | 2 weeks HFD | p     | Effect size<br>(Cohen's<br>d) | Test              |
|---------|-------|--------------|-------------|-------|-------------------------------|-------------------|
|         | Units | Mean ± SEM   | Mean ± SEM  |       |                               |                   |
| Week 5  | %     | 14.9 ± 0.9   | 17.2 ± 1.4  | 0.155 |                               |                   |
| Week 6  | %     | 26.1 ± 2.2   | 25.5 ± 1.5  | 0.721 |                               |                   |
| Week 7  | %     | 36.0 ± 2.9   | 33.4 ± 2.1  | 0.397 |                               |                   |
| Week 8  | %     | 41.7 ± 2.8   | 38.2 ± 2.2  | 0.283 |                               |                   |
| Week 9  | %     | 48.9 ± 3.4   | 44.0 ± 2.6  | 0.222 |                               |                   |
| Week 10 | %     | 55.0 ± 3.5   | 48.1 ± 2.2  | 0.075 |                               | Welch's<br>t-test |
| Week 11 | %     | 61.0 ± 3.6   | 53.1 ± 2.4  | 0.056 |                               |                   |
| Week 12 | %     | 63.9 ± 3.6   | 55.9 ± 2.6  | 0.068 |                               |                   |
| Week 13 | %     | 66.1 ± 3.5   | 60.8 ± 3.2  | 0.268 |                               |                   |
| Week 14 | %     | 71.3 ± 3.9   | 66.3 ± 3.3  | 0.337 |                               |                   |
| Week 15 | %     | 78.9 ± 4.9   | 92.4 ± 4.8  | 0.058 |                               |                   |
| Week 16 | %     | 86.5 ± 5.6   | 104.7 ± 5.0 | 0.022 | -0.63                         |                   |

Supplementary table 7

DEXA (dual energy X-ray absorptiometry) results for 16 week old female C57BL/6NTac mice exposed to HFD for varying lengths of time. n=30 per group. Mice were anaesthetised with Ketamine hydrochloride (100mg/kg)/Xylazine hydrochloride (10mg/kg) prior to measurement.

|                          |                   | Control Diet    | 2 weeks HFD     |       | Effect size<br>(Cohen's<br>d) | Test    |
|--------------------------|-------------------|-----------------|-----------------|-------|-------------------------------|---------|
|                          | Units             | Mean ± SEM      | Mean ± SEM      | p     |                               |         |
| Nose To Tail Base Length | cm                | 10.1 ± 0.03     | 10.0 ± 0.03     | 0.000 | -0.45                         |         |
| Bone Mineral Density     | g/cm <sup>2</sup> | 0.0512 ± 0.0002 | 0.0523 ± 0.0003 | 0.003 | -0.85                         |         |
| Bone Mineral Content     | g                 | 0.4691 ± 0.0041 | 0.4935 ± 0.0056 | 0.001 | -0.93                         |         |
| Bone Area                | cm <sup>2</sup>   | 9.16 ± 0.06     | 9.42 ± 0.06     | 0.003 | -0.80                         | Welch's |
| Lean Mass                | g                 | 20.82 ± 0.22    | 19.84 ± 0.24    | 0.004 | 0.78                          | t-test  |
| Fat Mass                 | g                 | 6.61 ± 0.53     | 9.51 ± 0.56     | 0.000 | -0.98                         |         |
| Est Total Tissue Mass    | g                 | 27.43 ± 0.71    | 29.35 ± 0.77    | 0.072 |                               |         |
| Fat Percentage Estimate  | %                 | 23.23 ± 1.28    | 31.61 ± 1.12    | 0.000 | -1.29                         |         |

Supplementary table 8

Clinical chemistry results for 16 week old female C57BL/6NTac mice exposed to HFD for varying lengths of time. n=30 per group. Blood was collected via retro-orbital puncture from mice that were anaesthetised with Ketamine hydrochloride (100mg/kg)/Xylazine hydrochloride (10mg/kg) into lithium heparin coated tubes and plasma analysed on an Olympus AU400.

|                          |             | Control Diet      | 2 weeks HFD        | p     | Effect size<br>(Cohen's<br>d) | Test              |
|--------------------------|-------------|-------------------|--------------------|-------|-------------------------------|-------------------|
|                          | Units       | Mean $\pm$ SEM    | Mean $\pm$ SEM     |       |                               |                   |
| <b>Electrolytes</b>      |             |                   |                    |       |                               |                   |
| Sodium                   | mmol/L      | 145.5 $\pm$ 0.2   | 143.48 $\pm$ 0.336 | 0.000 | 1.45                          |                   |
| Potassium                | mmol/L      | 3.4 $\pm$ 0.0     | 3.41 $\pm$ 0.036   | 0.839 |                               |                   |
| Chloride                 | mmol/L      | 108.6 $\pm$ 0.3   | 109.27 $\pm$ 0.327 | 0.157 |                               |                   |
| <b>Metabolic</b>         |             |                   |                    |       |                               |                   |
| Tail tip glucose         | mmol/L      | 7.9 $\pm$ 0.1     | 8.80 $\pm$ 0.2     | 0.000 | -1.01                         |                   |
| Glucose                  | mmol/L      | 16.45 $\pm$ 0.41  | 20.80 $\pm$ 0.444  | 0.000 | -1.88                         |                   |
| Triglycerides            | mmol/L      | 0.84 $\pm$ 0.05   | 0.51 $\pm$ 0.016   | 0.000 | 1.94                          |                   |
| Cholesterol              | mmol/L      | 2.00 $\pm$ 0.05   | 3.31 $\pm$ 0.113   | 0.000 | -2.96                         |                   |
| HDL                      | mmol/L      | 1.42 $\pm$ 0.03   | 2.29 $\pm$ 0.072   | 0.000 | -3.01                         |                   |
| LDL                      | mmol/L      | 0.33 $\pm$ 0.01   | 0.71 $\pm$ 0.029   | 0.000 | -3.56                         |                   |
| NEFAC                    | mmol/L      | 0.297 $\pm$ 0.02  | 0.34 $\pm$ 0.014   | 0.045 | -0.53                         |                   |
| Glycerol                 | $\mu$ mol/L | 134.9 $\pm$ 4.8   | 179.92 $\pm$ 4.559 | 0.000 | -1.77                         |                   |
| Fructosamine             | $\mu$ mol/L | 213.32 $\pm$ 2.26 | 194.44 $\pm$ 2.204 | 0.000 | 1.56                          |                   |
| Insulin                  | $\mu$ g/L   | 0.30 $\pm$ 0.03   | 0.57 $\pm$ 0.052   | 0.000 | -1.24                         |                   |
| <b>Pancreas</b>          |             |                   |                    |       |                               |                   |
| Amylase                  | U/L         | 543.3 $\pm$ 11.8  | 606.89 $\pm$ 10.23 | 0.000 | -1.06                         |                   |
| <b>Protein</b>           |             |                   |                    |       |                               |                   |
| Total protein            | g/L         | 47.2 $\pm$ 0.2    | 48.05 $\pm$ 0.31   | 0.103 |                               | Welch's<br>t-test |
| Albumin                  | g/L         | 26.20 $\pm$ 0.17  | 26.36 $\pm$ 0.182  | 0.977 |                               |                   |
| <b>Liver/Muscle</b>      |             |                   |                    |       |                               |                   |
| AST                      | U/L         | 56.9 $\pm$ 2.4    | 78.80 $\pm$ 4.88   | 0.092 |                               |                   |
| ALP                      | U/L         | 104.3 $\pm$ 2.3   | 102.04 $\pm$ 2.843 | 0.116 |                               |                   |
| ALT                      | U/L         | 33.4 $\pm$ 1.5    | 46.87 $\pm$ 3.682  | 0.544 |                               |                   |
| LDH                      | U/L         | 472.8 $\pm$ 16.3  | 442.85 $\pm$ 17.54 | 0.628 |                               |                   |
| Total bilirubin          | $\mu$ mol/L | 1.9 $\pm$ 0.1     | 2.01 $\pm$ 0.056   | 0.452 |                               |                   |
| CK                       | U/L         | 239.2 $\pm$ 24.2  | 165.11 $\pm$ 19.82 | 0.247 |                               |                   |
| <b>Kidney</b>            |             |                   |                    |       |                               |                   |
| Creatinine               | $\mu$ mol/L | 12.6 $\pm$ 0.4    | 8.64 $\pm$ 0.183   | 0.409 |                               |                   |
| Urea                     | mmol/L      | 11.1 $\pm$ 0.3    | 7.77 $\pm$ 0.25    | 0.939 |                               |                   |
| Uric acid                | $\mu$ mol/L | 24.5 $\pm$ 1.5    | 22.01 $\pm$ 1.301  | 0.880 |                               |                   |
| <b>Minerals and Iron</b> |             |                   |                    |       |                               |                   |
| Calcium                  | mmol/L      | 2.28 $\pm$ 0.01   | 2.26 $\pm$ 0.007   | 0.965 |                               |                   |
| Phosphorus               | mmol/L      | 2.2 $\pm$ 0.0     | 2.39 $\pm$ 0.035   | 0.005 | -1.00                         |                   |
| Magnesium                | mmol/L      | 1.07 $\pm$ 0.01   | 0.83 $\pm$ 0.01    | 0.263 |                               |                   |
| Iron                     | $\mu$ mol/L | 26.5 $\pm$ 0.7    | 26.07 $\pm$ 0.667  | 0.956 |                               |                   |

Supplementary table 9

Wet liver weights of 16 week old female C57BL/6NTac mice exposed to HFD for varying lengths of time. n=30 per group.

|              |       | <u>Control Diet</u> | <u>2 weeks HFD</u> |       | Effect size<br>(Cohen's<br>d) | Test             |
|--------------|-------|---------------------|--------------------|-------|-------------------------------|------------------|
|              | Units | Mean $\pm$ SEM      | Mean $\pm$ SEM     | p     |                               |                  |
| Liver weight | g     | 1.37 $\pm$ 0.03     | 1.66 $\pm$ 0.05    | 0.000 | -1.33                         | Student's t-test |



Supplementary table 10

Haematology results for 16 week old female C57BL/6NTac mice exposed to HFD for varying lengths of time. n=30 per group. Blood was collected via retro-orbital puncture from mice that were anaesthetised with Ketamine hydrochloride (100mg/kg)/Xylazine hydrochloride (10mg/kg) into EDTA coated tubes and analysed on a *scil* VetABC analyser.

|                   |                      | Control Diet | 2 weeks HFD   |       | Effect size<br>(Cohen's<br>d) | Test    |
|-------------------|----------------------|--------------|---------------|-------|-------------------------------|---------|
|                   | Units                | Mean ± SEM   | Mean ± SEM    | p     |                               |         |
| White blood cells | x10 <sup>3</sup> /μl | 5.65 ± 0.20  | 5.75 ± 0.21   | 0.731 |                               |         |
| Red blood cells   | x10 <sup>6</sup> /μl | 10.76 ± 0.08 | 10.60 ± 0.08  | 0.153 |                               |         |
| Haemoglobin       | g/dl                 | 15.87 ± 0.12 | 15.44 ± 0.11  | 0.010 | 0.70                          |         |
| Haematocrit       | %                    | 47.60 ± 0.35 | 46.98 ± 0.38  | 0.241 |                               |         |
| Mean cell volume  | fl                   | 44.24 ± 0.13 | 44.33 ± 0.09  | 0.553 |                               | Welch's |
| MCH               | pg                   | 14.75 ± 0.05 | 14.57 ± 0.05  | 0.018 | 0.64                          | t-test  |
| MCHC              | g/dl                 | 33.35 ± 0.13 | 32.87 ± 0.10  | 0.005 | 0.76                          |         |
| Platelets         | x10 <sup>3</sup> /μl | 1085 ± 19.8  | 1033.1 ± 15.0 | 0.040 | 0.55                          |         |
| RDW               | %                    | 11.69 ± 0.04 | 11.87 ± 0.04  | 0.002 | -0.84                         |         |
| MPV               | fl                   | 5.31 ± 0.02  | 5.46 ± 0.02   | 0.000 | -1.42                         |         |

Supplementary table 11

Incidence table of microscopic findings for follow-up study for male and female mice given 2 weeks HFD.

| Group     | Finding | Grade | C57BL/6NTac Males |     | C57BL/6NTac Females |     |
|-----------|---------|-------|-------------------|-----|---------------------|-----|
|           |         |       | No HFD            | HFD | No HFD              | HFD |
| micro     | 0       | 7     | 0                 | 10  | 2                   |     |
|           | 1       | 0     | 0                 | 0   | 1                   |     |
|           | 2       | 0     | 6                 | 0   | 5                   |     |
|           | 3       | 0     | 1                 | 0   | 2                   |     |
| macro     | 0       | 7     | 3                 | 10  | 2                   |     |
|           | 1       | 0     | 3                 | 0   | 4                   |     |
|           | 2       | 0     | 1                 | 0   | 3                   |     |
|           | 3       | 0     | 0                 | 0   | 1                   |     |
| Oil Red O | 0       | 7     | 0                 | 8   | 0                   |     |
|           | 1       | 0     | 1                 | 2   | 1                   |     |
|           | 2       | 0     | 3                 | 0   | 2                   |     |
|           | 3       | 0     | 2                 | 0   | 5                   |     |
|           | 4       | 0     | 1                 | 0   | 2                   |     |

Key

Micro = microvesicular vacuolation predominantly centrilobular

Macro = macrovesicular vacuolation (usually periportal)

ORO grading

1- occasional small lipid droplets

2- mainly small lipid droplets in <50% of cells

3- most cells have small or large lipid droplets

4- virtually all cells have droplets mainly large
